# Supplementary material for: Brain microbiota disruption within inflammatory demyelinating lesions in multiple sclerosis
Source: PubMed Central journal article supplement (PMC5125007; doi:10.1038/srep37344), 2016-11-28
Supplement: srep37344-s1.pdf [file srep37344-s1.pdf]

# Brain microbiota disruption within inflammatory demyelinating lesions in multiple sclerosis

W.G. Branton MSc<sup>1,7</sup>, J.Q. Lu MD PhD<sup>2,7</sup>, M.G. Surette PhD<sup>4</sup>, R.A. Holt PhD<sup>5</sup>, J. Lind PhD<sup>3</sup>, J.D. Laman PhD<sup>6</sup> and C. Power MD<sup>1,3,7</sup>

*Departments of Medicine<sup>1</sup>, Laboratory Medicine & Pathology<sup>2</sup>, and Psychiatry<sup>3</sup>, Multiple Sclerosis Centre<sup>7</sup>, University of Alberta, Edmonton AB; Department of Medicine<sup>4</sup>, McMaster University, Hamilton ON; Genome Sciences Centre<sup>5</sup>, Vancouver BC; Department of Neurosciences, Section of Medical Physiology, Faculty of Medical Sciences<sup>6</sup>, University Medical Center Groningen, University of Groningen, Groningen NL.*

Correspondence to C. Power MD, Department of Medicine (Neurology), 6-11 Heritage Medical Research Centre, University of Alberta, Edmonton, AB, Canada, T6G2S2. Email: [cp9@ualberta.ca](mailto:cp9@ualberta.ca), Tel: +017804071938, Fax: +017804071984

# Supplementary Figure 1

(+) Correlations

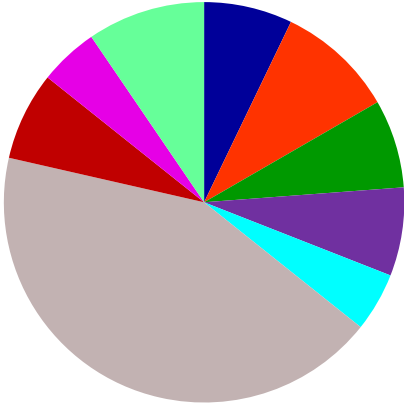

- regulation of I-kappaB kinase/NF-kappaB cascade
- secondary metabolic functions
- one-carbon metabolic process
- energy derivation by oxidation of organic compounds
- cellular polysaccharide biosynthetic process
- other
- positive regulation of protein kinase cascade
- DNA modification

(-) Correlations

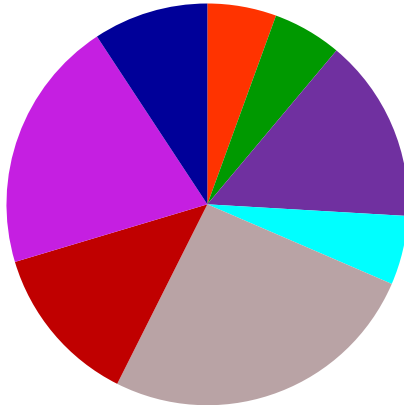

- regulation of neurological system process
- gene silencing
- cell proliferation
- regulation of ossification
- other
- regulation of cell death
- intracellular signaling cascade
- cell motion

**Supplementary Figure 1: *Host gene groups associated with bacterial gene expression.*** (A) The quantity of transcripts belonging to multiple human gene groups were positively correlated with the abundance of alpha-Proteobacteria sequences including NFκB-associated genes. (B) In contrast, several groups of genes implicated in cell gene and growth silencing were negatively correlated with alpha-Proteobacteria sequence levels.

# Supplementary Figure 2

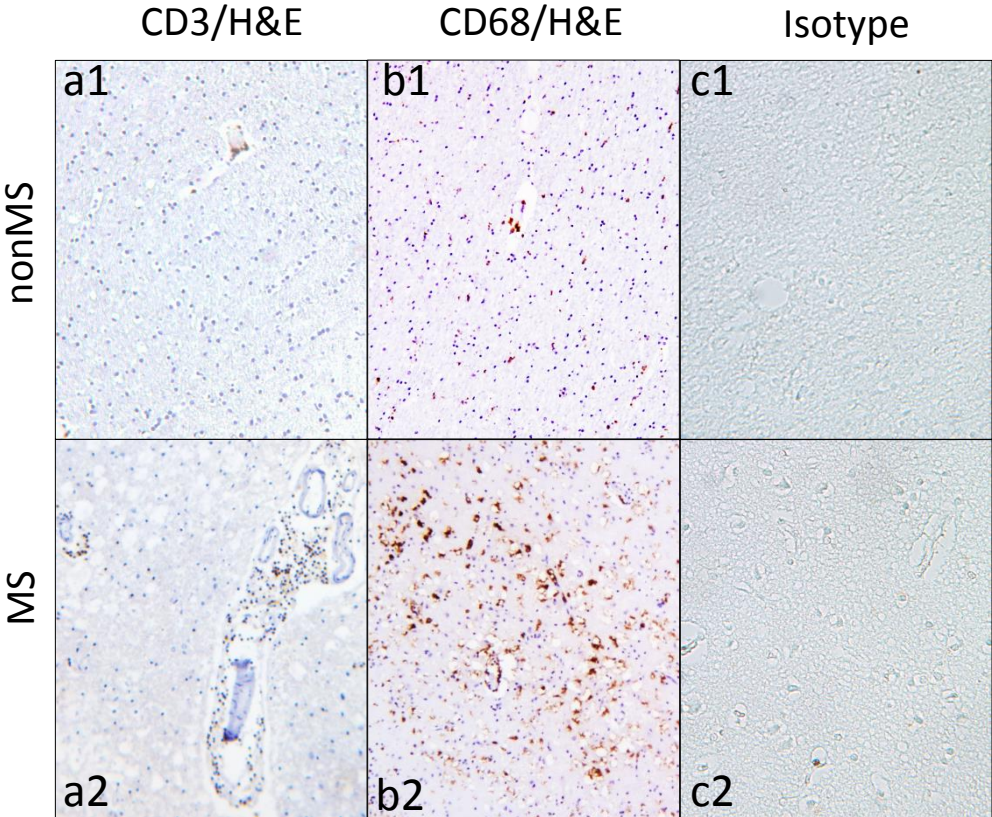

**Supplementary Figure 2: Immunohistochemical characterization of MS lesion.** (A) CD3 immunostaining (DAB: brown). (B) CD68 immunostaining (DAB: brown). (C) IgG1 isotype control for monoclonal antibodies used in this study.

# Supplementary Figure 3

Iba-1/PGN

GFAP/PGN

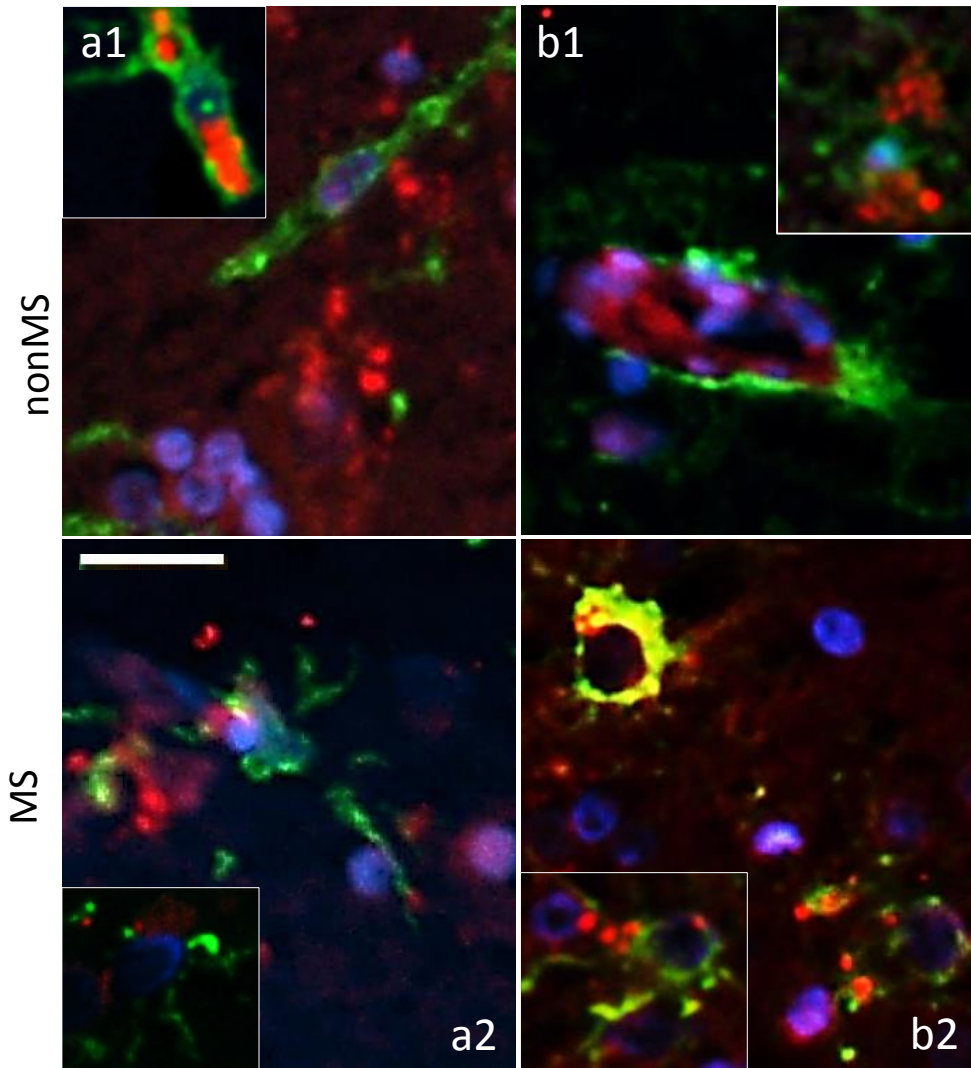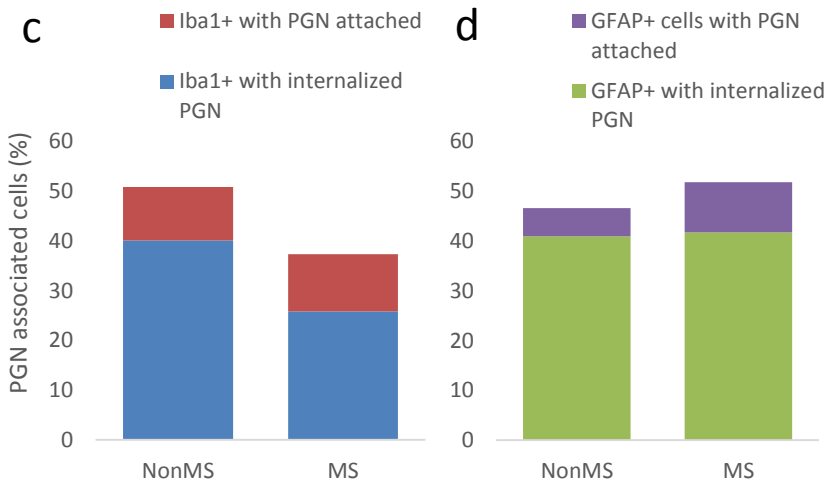

**Supplementary Figure 3: Immunofluorescent labelling of PGN and gliia.** a) Tissue sections from nonMS (a1) and MS (a2) patients immunolabeled with rabbit anti-Iba1 (green), mouse anti-PGN (Mab 995) (red) and DAPI (Blue) b) Tissue sections from nonMS (b1) and MS (b2) patients labeled with rabbit anti-GFAP (green), mouse anti-PGN (Mab 995) (red) and DAPI (Blue) c) Mean percentage of Iba1<sup>+</sup> with attached or internalized peptidoglycan (PGN). d) Mean percentage of GFAP<sup>+</sup> cells with attached or internalized peptidoglycan (PGN) Values represent the mean per case percentage from 10 non-adjacent fields of view (n=4).

# Supplementary Table 1: Primers used for semi-quantitative RT-PCR analysis and PCR detection of viruses

| Primer               | Sequence                 | Primer          | Sequence                           |
|----------------------|--------------------------|-----------------|------------------------------------|
| Hu HLA-DRA fwd       | GGACAAAGCCAACCTGGAAA     | HSV-1 fwd 1     | TTCTCGTTCCTCACTGCCTCCC             |
| Hu HLA-DRA rev       | AGGACGTTGGGCTCTCTCAG     | HSV-1 probe 1   | CGTCTGGACCAACCGCCACACAGGT          |
| hu_IL-10-fwd-1       | AATAAGGTTTCTCAAGGGGCT    | HSV-1 rev 1     | GCAGGCACACGTAACGCACGCT             |
| hu_IL-10-rev-1       | AGAACCAAGACCCAGACATCAA   | VZV-fwd 1       | CGGCATGGCCCCGTCTAT                 |
| hu_IL-4-fwd 1        | AGAAGACTCTGTGCACCGAGTTGA | VZV-probe 1     | ATTCAGCAATGGAAACACACGACGCC         |
| hu_IL-4-rev 1        | CTCTCATGATCGTCTTTAGCCTTT | VZV-rev 1       | CTCGCGTGCTGCGGC                    |
| hu_IL-6F             | ACCCCTGACCCAACCACAAAT    | HHV-6ab fwd 1   | GACAATCACATGCCTGGATAATG            |
| hu_IL-6R             | AGCTGCGCAGAATGAGATGAG    | HHV-6ab rev 1   | TGTAAGCGTGTGGTAATGGACTAA           |
| hu IL-23p19 fwd 1    | GAGCCTTCTCTGCTCCCTGAT    | HHV-6ab-Probe 1 | FAM-AGCAGCTGGCGAAAAGTGCTGTGC-TAMRA |
| hu IL-23p19 rev 1    | AGTTGGCTGAGGCCAGTAG      | EBV-fwd-1       | AAACCTCAGGACCTACGCTGC              |
| Hu CD3e fwd          | GATGCAGTCGGGCACTCACT     | EBV-probe 1     | TAGAGGTTTTGCTAGGGAGGAGACGTGTG      |
| Hu CD3e rev          | CAT ACCATCTTGCCCCAA      | EBV-rev-1       | AGACACCGTCCTCACCAC                 |
| hu IL-12p35 fwd 1    | AGCCTCCTCCTGTGCTACC      | CMV fwd 1       | GGCCGTTACTGTCTGCAGGA               |
| hu IL-12p35 rev 1    | GCCTCCACTGTGCTGGTTTTATC  | CMV probe 1     | CCGTATTGGTGC GCGATCTGTTCAA         |
| Hu PD-L1 (cd274) fwd | CTTCAAGCAGGGATTCTCAACCT  | CMV rev 1       | GGCCTCGTAGTGAAAATTAATGGT           |
| Hu PD-L1 (cd274) rev | TAAGTCCCACATTGCCTGCAT    | HCoV229EE7      | TCTGCCAAGAGTCTTGCTCG               |
| mus IFN-alpha fwd    | AGGACAGGAAGGATTTTGGGA    | HCoV229EE7.1    | CAAAAGAACAAAAGCARGAAATCG           |
| mus IFN-alpha rev    | GCTGCTGATGGAGGTCATT      | HCoVE9          | AGCATAGCAGCTGTTGACGG               |
| mus IL-12p35 fwd 1   | CATCGATGAGCTGATGCAGT     | HCoVE9.1        | GCTCAGCAAATTGTGGATAGC              |
| mus IL-12p35 rev 1   | CAGATAGCCCATCACCTGT      | SAFV-F          | CCCCCTTCAATTATAAGATTACACC          |
| IL-1b-F              | CCAAAGAAGAAGATGGAAAAGC   | SAFVF2          | GGACGATTGTTCTGACAACT               |
| IL-1b-R              | GGTGCTGATGTACCAGTTGGG    | SAFVR           | AGCTTTTCCTTTAGAGTACCTGG            |
| 16s 339F             | CTCCTACGGGAGGCAGCAGT     | SAFVR2          | GCTAACCATTGCTTTCAAAT               |
| 16s514F              | CGTGCCAGCAGCCGCGGTAAT    |                 |                                    |
| 16s926r              | CCGTCAATTCCTTTRAGTTT     |                 |                                    |
| 16s806R              | TCATCGTTTACGGCGTGGACTACC |                 |                                    |

**Supplementary Table 2: Mean neuropathological scores in MS and nonMS patients**

|             | <b>MS</b>  | <b>nonMS</b> | <b><i>p</i> value</b> |
|-------------|------------|--------------|-----------------------|
| <b>PGN</b>  | 3.76 ±0.49 | 3.33 ±0.52   | 2.20E-01              |
| <b>LFB</b>  | 7.0 ±3.48  | 0.14 ±0.19   | 2.77E-05              |
| <b>CD68</b> | 17.9 ±3.19 | 8.8 ±4.03    | 1.11E-03              |
| <b>CD3</b>  | 10.1 ±3.22 | 3.9 ±2.91    | 1.74E-03              |

### Supplementary Table 3: Virus detection in brain

| <b>Patient group</b> | <b>HHV-6 A/B<sup>1</sup></b> | <b>VZV<sup>1</sup></b> | <b>EBV<sup>1</sup></b> | <b>HSV-1<sup>1</sup></b> | <b>CMV<sup>1</sup></b> | <b>KSHV<sup>1</sup></b> | <b>SAFV<sup>2</sup></b> | <b>CoV<sup>2</sup></b> |
|----------------------|------------------------------|------------------------|------------------------|--------------------------|------------------------|-------------------------|-------------------------|------------------------|
| <b>MS</b>            | 0/8                          | 0/8                    | 0/8                    | 0/8                      | 1/6                    | 1/9                     | 0/6                     | 0/6                    |
| <b>nonMS</b>         | 3/8                          | 0/8                    | 1/8                    | 0/9                      | 3/8                    | 0/7                     | 0/6                     | 1/6                    |

1. Viral DNA detection by PCR. 2. Viral RNA detection by RT-PCR
